# Supplementary material for: Changes in satellite retrievals of atmospheric composition over eastern China during the 2020 COVID-19 lockdowns
Source: Copernicus journal article supplement (doi:10.5194/acp-2020-567), 2020-07-16
Supplement: Supplementary file 1 [file acp-2020-567-supplement.pdf]

# Supplementary information

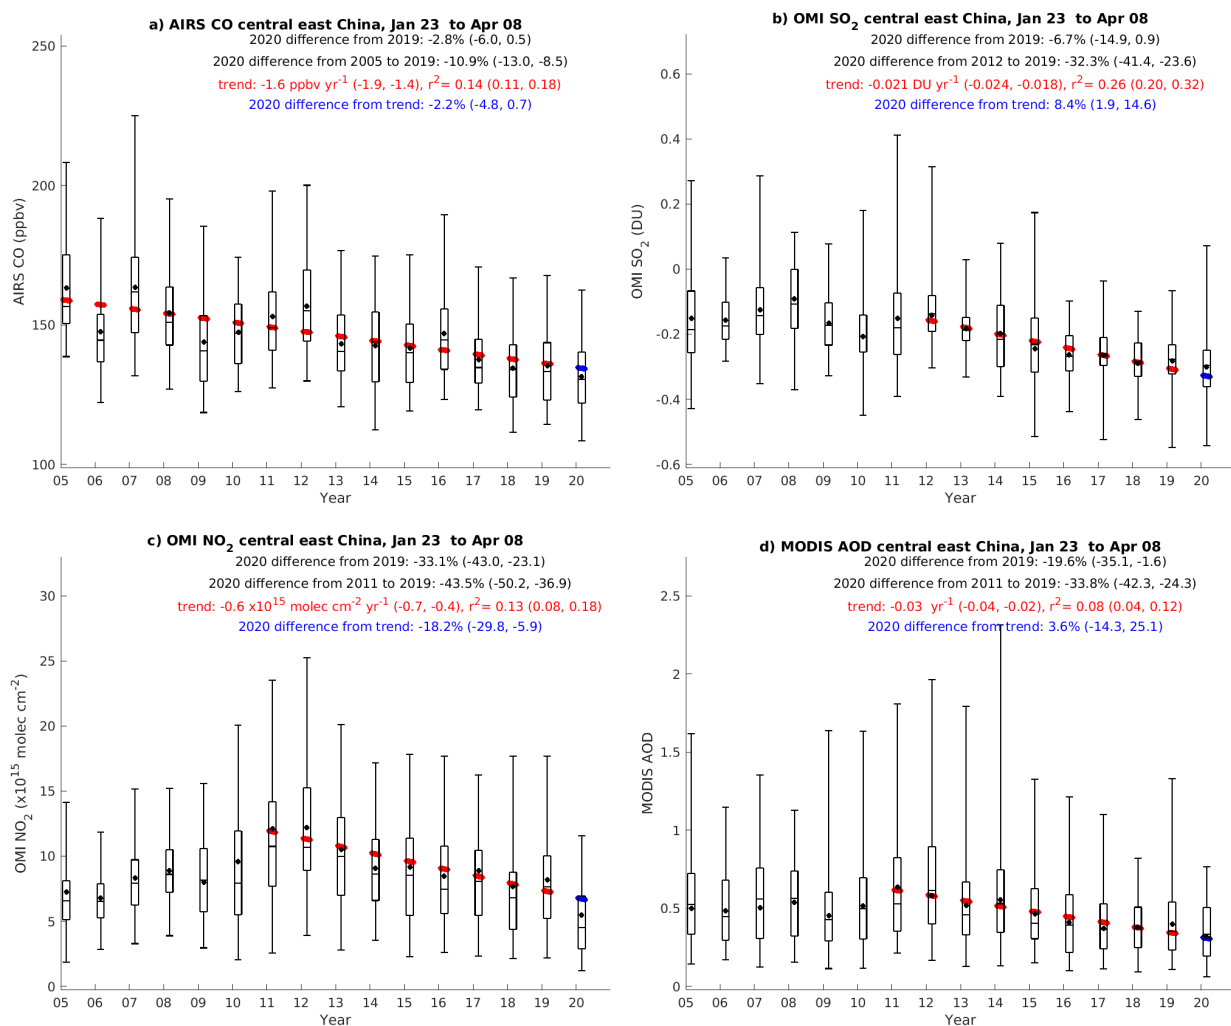

Figure S1. Same as Figure 5, but when daily values are calculated from the median of individual retrievals over central east China, rather than the mean.

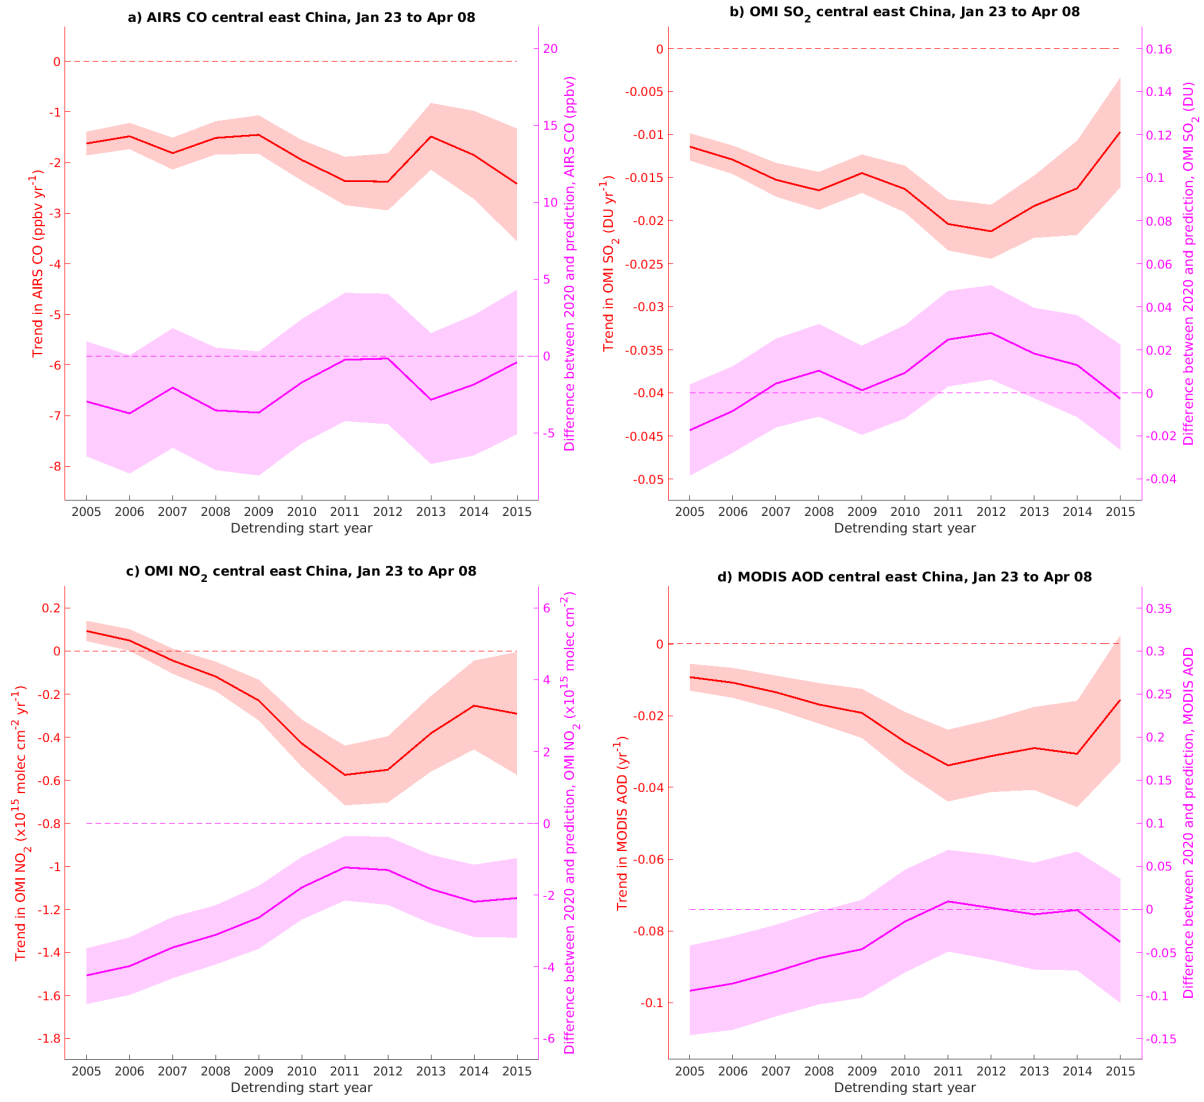

**Figure S2.** Same as Figure 7, but when daily values are calculated from the median of individual retrievals, rather than the mean.

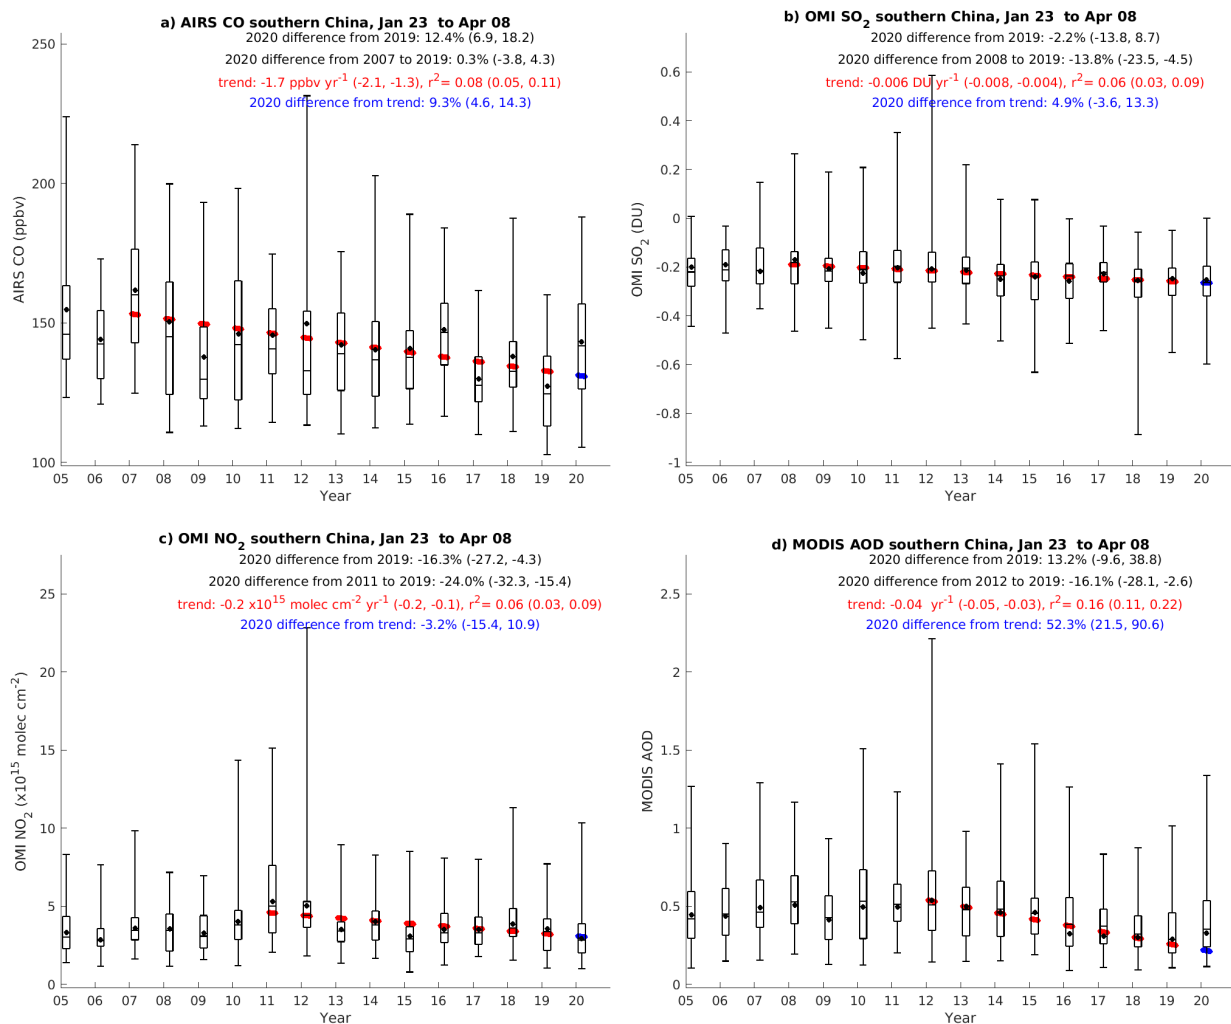

Figure S3. Same as Figure 7, but when daily values are calculated from the median of individual retrievals, rather than the mean.

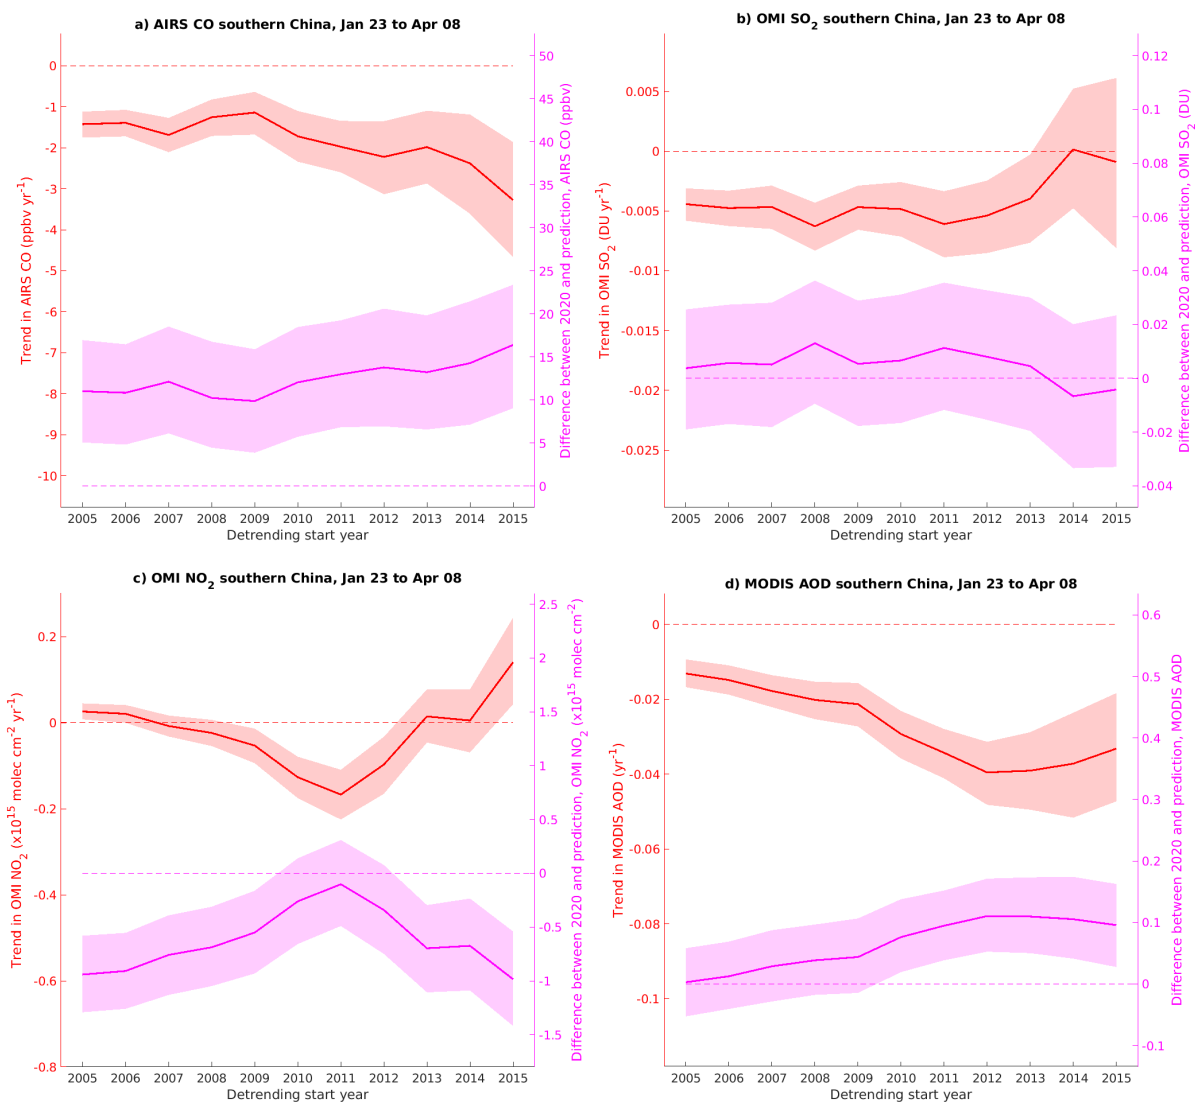

**Figure S4.** Same as Figure 7, but when daily values are calculated from the median of individual retrievals, rather than the mean.
